# Supplementary material for: Control of Maize Sheath Blight and Elicit Induced Systemic Resistance Using Paenibacillus polymyxa Strain SF05
Source: MDPI journal article supplement (doi:10.3390/microorganisms10071318), 2022-06-29
Supplement: s1 [file s1]

**Table S1 Physiological and biochemical characteristics (enzyme activities, carbon source oxidation) of *P. polymyxa* strain SF05**

| Substrate and enzyme |                               |                                             | Result |
|----------------------|-------------------------------|---------------------------------------------|--------|
| ONPG                 | Ortho-Nitrophenyl-Galactoside | $\beta$ - Galactosidase                     | +      |
| ADH                  | Arginine                      | Arginine-Dihydrolase                        | -      |
| LDC                  | Lysine                        | Lysine Decarboxylase                        | -      |
| ODC                  | Ornithine                     | Ornithine Decarboxylase                     | -      |
| CIT                  | Sodium Citrate Dihydrate      | Citric Acid Utilize                         | -      |
| H2S                  | Sodium Thiosulfate            | H2S Generate                                | -      |
| URE                  | Urea                          | Urease                                      | -      |
| TDA                  | Tryptophan                    | Tryptophan Deaminase                        | -      |
| IND                  | Tryptophan                    | Indole Produce                              | -      |
| VP                   | Pyruvate                      | 3-hydroxybutanone to acetyl methyl methanol | +      |
| GEL                  | Kohn Gelatin                  | Gelatinase                                  | +      |
| GLU                  | Glucose                       | Fermentation / Oxidation (4)                | -      |
| MAN                  | Mannitol                      | Fermentation / Oxidation (4)                | -      |
| INO                  | Inositol                      | Fermentation / Oxidation (4)                | -      |
| SOR                  | Sorbitol                      | Fermentation / Oxidation (4)                | -      |
| RHA                  | Rhamnose                      | Fermentation / Oxidation (4)                | -      |
| SAC                  | Sucrose                       | Fermentation / Oxidation (4)                | -      |
| MEL                  | Melibiose                     | Fermentation / Oxidation (4)                | -      |

|     |           |                              |   |
|-----|-----------|------------------------------|---|
| AMY | Amygdalin | Fermentation / Oxidation (4) | - |
| ARA | Arabinose | Fermentation / Oxidation (4) | - |

---

**+: Positive; -: Negative**

**Table S2 Physiological and biochemical characteristics (acid production from carbon source) of*****P. polymyxa* strain SF05.**

| Substrate                    | Result | Substrate          | Result |
|------------------------------|--------|--------------------|--------|
| 0 Contrast                   | -      | 25 Esculin Hydrate | +      |
| 1 Glycerol                   | +      | 26 Salicin         | +      |
| 2 Erythritol                 | -      | 27 Cellobiose      | +      |
| 3 D-Arabinose                | -      | 28 Maltose         | +      |
| 4 L-Arabinose                | +      | 29 Lactose         | +      |
| 5 Ribose                     | +      | 30 Melibiose       | +      |
| 6 D-Xylose                   | +      | 31 Sucrose         | +      |
| 7 L-Xylose                   | -      | 32 Trehalose       | +      |
| 8 Adonitol                   | -      | 33 Synanthrin      | +      |
| 9 $\beta$ -Methyl-D-Xyloside | -      | 34 Melezitose      | -      |
| 10 Galactose                 | +      | 35 Raffinose       | +      |
| 11 Glucose                   | +      | 36 Amylum          | +      |
| 12 Fructose                  | +      | 37 Glycogen        | +      |
| 13 Mannose                   | +      | 38 Xylitol         | -      |
| 14 Sorbitol                  | -      | 39 Geraniol        | W      |
| 15 Rhamnose                  | -      | 40 D-Turanose      | W      |
| 16 Dulcitol                  | -      | 41 D-Lyxose        | -      |
| 17 Inositol                  | -      | 42 D-Tagatose      | -      |

|                                  |   |                     |   |
|----------------------------------|---|---------------------|---|
| 18 Mannitol                      | + | 43 D- Fucose        | - |
| 19 Sorbitol                      | - | 44 L- Fucose        | - |
| 20 $\alpha$ -Methyl-D- Mannoside | - | 45 D-Arabinitol     | - |
| 21 $\alpha$ -Methyl-D- Glucoside | + | 46 L-Arabinitol     | - |
| 22 N-Acetyl-Glucosamine          | - | 47 Gluconate        | - |
| 23 Amygdalin                     | + | 48 2-Keto-Gluconate | - |
| 24 Arbutin                       | + | 49 5-Keto-Gluconate | - |

**+: Positive; -: Negative; W: Weakly positive**

**Table S3 Physiological and biochemical characteristics (BIOLOG carbon assimilation) of *P. polymyxa* strain SF05.**

| Test item |                             |        | Test item |                           |        |
|-----------|-----------------------------|--------|-----------|---------------------------|--------|
| Test item |                             | Result | Test item |                           | Result |
| A1        | Negative Control            | -      | E1        | Gelatin                   | -      |
| A2        | Dextrin                     | +      | E2        | Glycyl-L-Proline          | -      |
| A3        | D-Maltose                   | +      | E3        | L-Alanine                 | -      |
| A4        | D-Trehalose                 | +      | E4        | L-Arginine                | -      |
| A5        | D-Cellobiose                | +      | E5        | L-Aspartic Acid           | -      |
| A6        | Gentiobiose                 | +      | E6        | L-Glutamic Acid           | -      |
| A7        | Sucrose                     | +      | E7        | L-Histidine               | -      |
| A8        | D-Turanose                  | +      | E8        | L-Pyroglutamic Acid       | -      |
| A9        | Stachyose                   | +      | E9        | L-Serine                  | -      |
| A10       | Positive Control            | +      | E10       | Lincomycin                | W      |
| A11       | pH6                         | +      | E11       | Guanidine HCl             | +      |
| A12       | pH5                         | W      | E12       | Niaproof 4                | -      |
| B1        | D-Raffinose                 | +      | F1        | Pectin                    | +      |
| B2        | $\alpha$ -D-Lactose         | +      | F2        | D-Galacturonic Acid       | +      |
| B3        | D-Melibiose                 | +      | F3        | L-Galactonic-Acid Lactone | +      |
| B4        | $\beta$ -Methyl-D-Glucoside | +      | F4        | D-Gluconic Acid           | +      |
| B5        | D-Salicin                   | +      | F5        | D-Glucuronic Acid         | -      |
| B6        | N-Acetyl-D-Glucosamine      | -      | F6        | Glucuronamide             | -      |

|     |                          |   |     |                             |   |
|-----|--------------------------|---|-----|-----------------------------|---|
| B7  | N-Acetyl-β-D-Mannosamine | - | F7  | Mucic Acid                  | - |
| B8  | N-Acetyl-D-Galactosamine | - | F8  | Quinic Acid                 | - |
| B9  | N-Acetyl Neuraminic Acid | - | F9  | D-Saccharic Acid            | - |
| B10 | 1% NaCl                  | + | F10 | Vancomycin                  | - |
| B11 | 4% NaCl                  | W | F11 | Tetrazolium Violet          | W |
| B12 | 8% NaCl                  | - | F12 | Tetrazolium Blue            | W |
| C1  | α-D-Glucose              | + | G1  | p-Hydroxy-Phenylacetic Acid | - |
| C2  | D-Mannose                | + | G2  | Methyl Pyruvate             | - |
| C3  | D-Fructose               | + | G3  | D-Lactic Acid Methyl Ester  | - |
| C4  | D-Galactose              | + | G4  | L-Lactic Acid               | - |
| C5  | 3-Methyl-Glucose         | - | G5  | Citric Acid                 | - |
| C6  | D-Fucose                 | - | G6  | α-Keto-Glutaric Acid        | - |
| C7  | L-Fucose                 | - | G7  | D-Malic Acid                | - |
| C8  | L-Rhamnose               | - | G8  | L-Malic Acid                | - |
| C9  | Inosine                  | - | G9  | Bromo-Succinic Acid         | - |
| C10 | 1% Sodium Lactate        | + | G10 | Nalidixic Acid              | - |
| C11 | Fusidic Acid             | - | G11 | Lithium Chloride            | + |
| C12 | D-Serine                 | - | G12 | Potassium Tellurite         | + |
| D1  | D-Sorbitol               | - | H1  | Tween 40                    | - |
| D2  | D-Mannitol               | + | H2  | γ— Amino-Butyric Acid       | - |
| D3  | D-Arabinol               | - | H3  | α-Hydroxy-Butyric Acid      | - |

|     |                              |   |     |                                   |   |
|-----|------------------------------|---|-----|-----------------------------------|---|
| D4  | myo-Inositol                 | - | H4  | $\beta$ -Hydroxy-D,L Butyric Acid | - |
| D5  | Glycerol                     | + | H5  | $\alpha$ -Keto-Butyric Acid       | - |
| D6  | D-Glucose-6-PO <sub>4</sub>  | - | H6  | Acetoacetic Acid                  | - |
| D7  | D-Fructose-6-PO <sub>4</sub> | - | H7  | Propionic Acid                    | - |
| D8  | D- Aspartic Acid             | - | H8  | Acetic Acid                       | - |
| D9  | D-Serine                     | - | H9  | Formic Acid                       | - |
| D10 | Troleandomycin               | - | H10 | Aztreonam                         | - |
| D11 | Rifamycin SV                 | - | H11 | Sodium Butyrate                   | + |
| D12 | Minocycline                  | - | H12 | Sodium Bromate                    | W |

**+: Positive; -: Negative; W: Weakly positive.**

**Table S4 Prediction of biofilm formation pathways genes in *P. polymyxa* genomes.**

| Pathway                       | 1  | 2  | 3  | 4  | 5  | 6  | 7  | 8  | 9  | 10 |
|-------------------------------|----|----|----|----|----|----|----|----|----|----|
| <b>Biofilm formation –</b>    |    |    |    |    |    |    |    |    |    |    |
| <i>Escherichia coli</i>       | 13 | 13 | 14 | 14 | 12 | 13 | 14 | 13 | 14 | 14 |
| <b>Biofilm formation –</b>    |    |    |    |    |    |    |    |    |    |    |
| <i>Pseudomonas aeruginosa</i> | 10 | 9  | 9  | 9  | 8  | 9  | 9  | 9  | 9  | 8  |
| <b>Biofilm formation –</b>    |    |    |    |    |    |    |    |    |    |    |
| <i>Vibrio cholerae</i>        | 12 | 11 | 12 | 12 | 11 | 11 | 11 | 11 | 12 | 12 |
| <b>Total</b>                  | 35 | 33 | 35 | 35 | 31 | 33 | 34 | 33 | 35 | 34 |

\*: The numbers in the first line in the table represented the genome of *P. polymyxa* SF05 (1), ZF129 (2), CF05 (3), YC0573 (4), Sb3-1 (5), HY96-2 (6), CJX518 (7), JE201 (8), EBL06 (9) and E681 (10).



**Table S5 Prediction of cell wall degradation enzyme genes in *P. polymyxa* genomes.**

| Family       | Function                  | 1  | 2  | 3  | 4  | 5  | 6  | 7  | 8  | 9  | 10 |
|--------------|---------------------------|----|----|----|----|----|----|----|----|----|----|
| <b>CBM16</b> |                           | 1  | 1  | 1  | 0  | 1  | 1  | 1  | 1  | 1  | 0  |
| <b>CBM46</b> |                           | 1  | 2  | 2  | 1  | 2  | 2  | 2  | 2  | 2  | 2  |
| <b>CBM59</b> | Cellulose degradation     | 0  | 1  | 1  | 0  | 0  | 1  | 1  | 1  | 1  | 0  |
| <b>CBM63</b> |                           | 1  | 1  | 1  | 1  | 1  | 1  | 1  | 1  | 1  | 1  |
| <b>GH5</b>   |                           | 4  | 6  | 6  | 4  | 6  | 6  | 7  | 6  | 6  | 5  |
| <b>CBM3</b>  |                           | 2  | 5  | 5  | 5  | 5  | 5  | 5  | 5  | 5  | 5  |
| <b>CBM50</b> |                           | 1  | 1  | 1  | 1  | 1  | 1  | 1  | 1  | 1  | 0  |
| <b>CBM54</b> | Chitin degradation        | 0  | 0  | 0  | 0  | 0  | 0  | 1  | 0  | 0  | 0  |
| <b>GH16</b>  |                           | 2  | 1  | 1  | 1  | 2  | 1  | 2  | 1  | 1  | 0  |
| <b>GH18</b>  |                           | 3  | 2  | 3  | 2  | 3  | 3  | 3  | 3  | 3  | 3  |
| <b>GH48</b>  |                           | 0  | 1  | 1  | 1  | 1  | 1  | 1  | 1  | 1  | 1  |
| <b>PL9</b>   | Peptidoglycan degradation | 2  | 2  | 2  | 2  | 2  | 2  | 2  | 2  | 2  | 2  |
| <b>Total</b> |                           | 17 | 23 | 24 | 18 | 24 | 24 | 27 | 24 | 24 | 19 |

\*: The numbers in the first line in the table represented the genome of *P. polymyxa* SF05 (1), ZF129 (2), CF05 (3), YC0573 (4), Sb3-1 (5), HY96-2 (6), CJX518 (7), JE201 (8), EBL06 (9) and E681 (10).

**Table S6. Prediction of secondary metabolite biosynthesis gene cluster in *P. polymyxa* genomes.**

[illegible]

|                       |   |   |   |   |   |   |   |   |   |   |
|-----------------------|---|---|---|---|---|---|---|---|---|---|
| <b>S-Layer Glycan</b> | 0 | 0 | 1 | 0 | 1 | 1 | 1 | 1 | 0 | 0 |
| <b>Tauramamide</b>    | 1 | 0 | 0 | 1 | 0 | 0 | 0 | 0 | 0 | 0 |
| <b>Tridecaptin</b>    | 1 | 1 | 1 | 1 | 1 | 1 | 1 | 2 | 1 | 1 |

\*: The numbers in the first line in the table represented the genome of *P. polymyxa* SF05 (1), ZF129 (2), CF05 (3), YC0573 (4), Sb3-1 (5), HY96-2 (6), CJX518 (7), JE201 (8), EBL06 (9) and E681 (10).
